# Supplementary material for: Variational autoencoder-based chemical latent space for large molecular structures with 3D complexity
Source: PubMed Central journal article supplement (PMC10654724; doi:10.1038/s42004-023-01054-6), 2023-11-16
Supplement: 42004_2023_1054_MOESM3_ESM.pdf [file 42004_2023_1054_MOESM3_ESM.pdf]

# Description of Additional Supplementary Files

**File name:** Supplementary Data 1

**Description:** Supplementary data for figures
